# Supplementary material
Source: PubMed Central journal article supplement (PMC2910254)
Supplement: NIHMS219230-supplement-Supp1.pdf [file NIHMS219230-supplement-Supp1.pdf]

## Supplementary Tables

| <b>In situ hybridization probes</b> |                                     |                            |                 |
|-------------------------------------|-------------------------------------|----------------------------|-----------------|
| <b>Gene</b>                         | <b>Genbank<br/>Accession Number</b> | <b>Clone ID</b>            | <b>Cat. No</b>  |
| Etv1                                | BC005645                            | PCR                        |                 |
| Etv4                                | BU053662                            | 5062538                    | EMM1002-5544031 |
| Etv5                                | BC034680                            | 4036564                    | MMM1013-7511524 |
| Fev                                 | AI876263                            | UI-M-BH3-<br>AVJ-B-02-0-UI | EMM1002-2537418 |
| Elk1                                | BC054474                            | 30045506                   | MMM1013-9201805 |

  

| <b>Antibodies</b> |                    |                                  |                 |
|-------------------|--------------------|----------------------------------|-----------------|
| <b>Antigen</b>    | <b>Species</b>     | <b>Supplier/<br/>Catalog No.</b> | <b>Dilution</b> |
| DAT; Slc6a3       | Rat,<br>monoclonal | Millipore: MAB369                | 1:500           |
| TH                | Rabbit             | Millipore: AB152                 | 1:500           |
| Vmat2; Slc18a2    | Rabbit             | Millipore: AB1598P               | 1:500           |
| Nurr1; Nr4a2      | Rabbit             | Santa Cruz: SC-5568              | 1:500           |

**Supplementary Table 1. In situ hybridization probes and antibodies.** Clones containing probes were obtained from Open Biosystems and the corresponding catalog numbers are given. All antibodies gave staining patterns consistent with the mRNA expression of the corresponding gene determined by in situ hybridization in our experiments or in available expression databases. DA pathway antigens also produced signal in known targets of DA innervation, such as the striatum. Ectopic staining outside of these known areas was not observed.

| Gene                     | Allen atlas SN/VTA<br>expression |       |       | Other E15.5 CNS<br>expression | Other Adult CNS<br>expression      |
|--------------------------|----------------------------------|-------|-------|-------------------------------|------------------------------------|
|                          | E11.5                            | E13.5 | E15.5 |                               |                                    |
| <b>Ehf</b>               | -                                | -     | -     | NE                            | Olf                                |
| <b>Elf1</b>              | -                                | -     | -     | NE                            | NE                                 |
| <b>Elf2</b>              | -                                | -     | -     | NE                            | NE                                 |
| <b>Elf3</b>              | -                                | -     | -     | NE                            | NE                                 |
| <b>Elf4</b>              | -                                | -     | -     | NE                            | NE                                 |
| <b>Elf5</b>              | -                                | -     | -     | NE                            | Diffuse?                           |
| <b>*Elk1</b>             | -                                | -     | -     | NE                            | Hip                                |
| <b>Elk3</b>              | -                                | -     | -     | NE                            | CB, Hip, Olf?                      |
| <b>Elk4</b>              | -                                | -     | ND    | NE                            | NE                                 |
| <b>*Etv1/ Er81</b>       | -                                | -     | -     | Ctx, Hab, IO                  | CB, Ctx, Hab, Hip                  |
| <b>Erf</b>               | -                                | -     | -     | NE                            | NE                                 |
| <b>Erg/ V-ets</b>        | -                                | -     | -     | NE                            | NE                                 |
| <b>Ets1</b>              | -                                | -     | -     | NE                            | NE                                 |
| <b>*Ets2</b>             | -                                | -     | -     | NE                            | Ctx                                |
| <b>Etv2/<br/>Etsrp71</b> | -                                | -     | -     | NE                            | NE                                 |
| <b>*Etv5/ Erm</b>        | -                                | -     | -     | NE                            | CB, Ctx, Hip, Olf,<br>Str, SN, VTA |
| <b>Etv6/ Tel</b>         | -                                | -     | -     | NE                            | NE                                 |
| <b>Fev/ Pet1</b>         | ND                               | ND    | -     | NE                            | 5HT                                |
| <b>Fli1</b>              | -                                | -     | ND    | NE                            | NE                                 |
| <b>Gabpa</b>             | -                                | -     | -     | NE                            | NE                                 |
| <b>Etv3/ Pe1</b>         | -                                | -     | -     | NE                            | NE                                 |
| <b>*Etv4/ Pea3</b>       | -                                | -     | -     | NE                            | NE                                 |
| <b>*Spedf/ Pse</b>       | -                                | -     | -     | NE                            | NE                                 |
| <b>Sfpi1/ Pu.1</b>       | -                                | -     | -     | NE                            | NE                                 |
| <b>Spib</b>              | -                                | -     | -     | NE                            | NE                                 |
| <b>Spic</b>              | -                                | -     | -     | NE                            | NE                                 |

**Supplementary Table 2. Ets gene family expression in developing and adult CNS.** 5HT, serotonergic neurons; CB, cerebellum; Ctx, cerebral cortex; Hab, habenula; Hip, hippocampal region; IO, inferior olive; Str, striatum; SN, substantia nigra; VTA, ventral tegmental area. ND, no data; NE, no expression. Mouse Ets family members correspond closely to those identified in

the human (Oikawa and Yamada, 2003; Hollenhorst et al., 2007), with the exception of Etv7, which does not have an identified mouse transcript in NCBI. \*See also Supplemental Figures S3-S6.

Hollenhorst PC, Shah AA, Hopkins C, Graves BJ (2007) Genome-wide analyses reveal properties of redundant and specific promoter occupancy within the ETS gene family. *Genes Dev* 21:1882-1894.

Oikawa T, Yamada T (2003) Molecular biology of the Ets family of transcription factors. *Gene* 303:11-34.

**Supplementary Figure 1. Etv5 expression in adult mouse brain.** The expression of Etv5 in adult mouse brain was visualized by ISH in coronal sections. (A) cerebral cortex, (B) ventral midbrain. SN, substantia nigra. Scale is 250 $\mu$ m.

**Supplementary Figure 2. Projections of ventral midbrain DA neurons in Etv5<sup>-/-</sup> mice.**

Tyrosine hydroxylase (TH) immunostaining was used to visualize the projections of DA neurons in coronal sections of adult mice (diagram). (A,C) proximal part of medial forebrain bundle in control (WT, A) and Etv5<sup>-/-</sup> (KO, C) mice. (B,D) dorsal striatum of control (B) and Etv5<sup>-/-</sup> mice (D). Scale is 100 $\mu$ m.

**Supplementary Figure 3. Expression of Ets family members in GenePaint embryo maps at**

**E14.5.** Sagittal sections near the midline are shown. Expression patterns of TH and Nurr1 mRNA serve to localize precursors of the DA neurons of the SN/VTA. Expression of Ets family transcription factors, including Etv1, Etv4, Etv5, Spdef, Fev, Ets2 and Elk1 cannot be detected in the ventral midbrain in corresponding sections. Etv5 signal in the cerebral cortex and lung confirms effective hybridization with this probe. Ctx, cerebral cortex; DRG, dorsal root ganglia; Hb, habenula; Hyp, hypothalamus; OB, olfactory bulb; SC, superior colliculus; SG, sympathetic ganglia; SN/VTA, substantia nigra/ventral tegmental area.

**Supplementary Figure 4. Expression of Ets family transcripts in Allen Developing Mouse**

**Brain Atlas at E11.5.** Sagittal sections near the midline are shown. TH and Nurr1 expression identifies precursors of the DA neurons of the SN/VTA. None of these Ets transcription factors

are detected in the ventral midbrain at this stage. SC, superior colliculus; SG, sympathetic ganglia; SN/VTA, substantia nigra/ventral tegmental area; Tel, telencephalon.

**Supplementary Figure 5. Expression of Ets family transcripts in Allen Developing Mouse Brain Atlas at E13.5.** Sagittal sections near the midline are shown. TH and Nurr1 expression identifies the DA neurons of the SN/VTA. None of these Ets transcription factors are detected in the ventral midbrain at this stage. Hb, habenula; OB, olfactory bulb; SC, superior colliculus; SN/VTA, substantia nigra/ventral tegmental area.

**Supplementary Figure 6. Expression of Ets family transcripts in Allen Developing Mouse Brain Atlas at E15.5.** Sagittal sections near the midline are shown. TH and Nurr1 expression identifies the DA neurons of the SN and VTA. None of these Ets transcription factors are detected in the ventral midbrain at this stage. Hb, habenula; Hyp, hypothalamus; OB, olfactory bulb; SC, superior colliculus; SN/VTA, substantia nigra/ventral tegmental area.

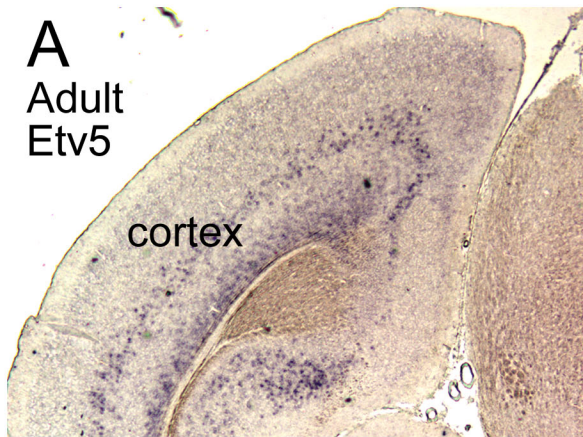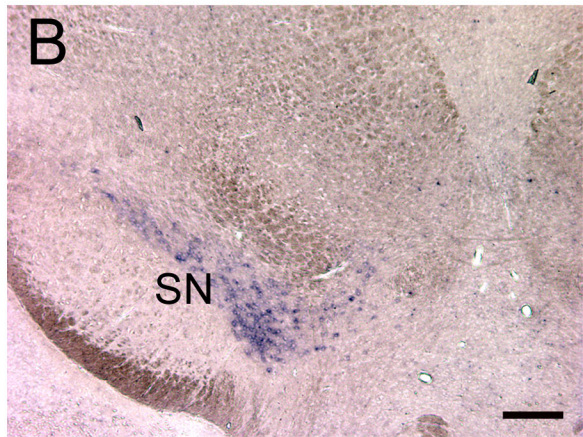

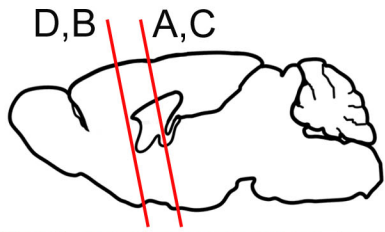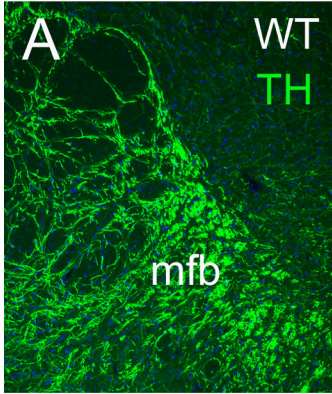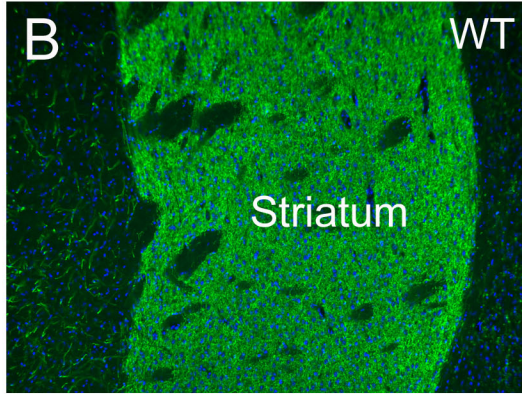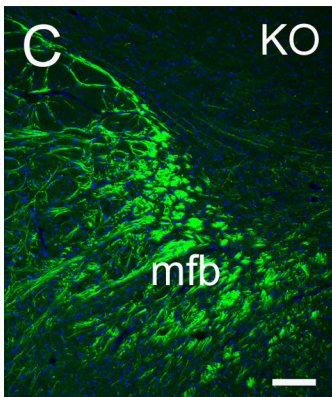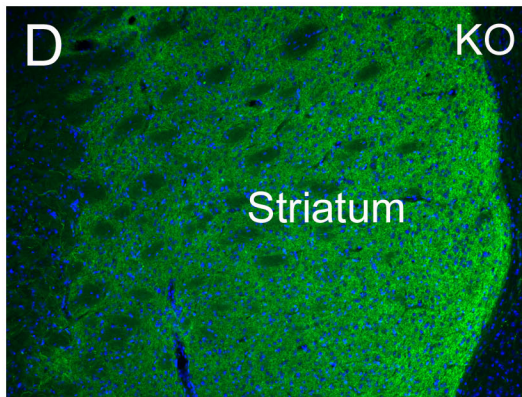



E14.5 GenePaint

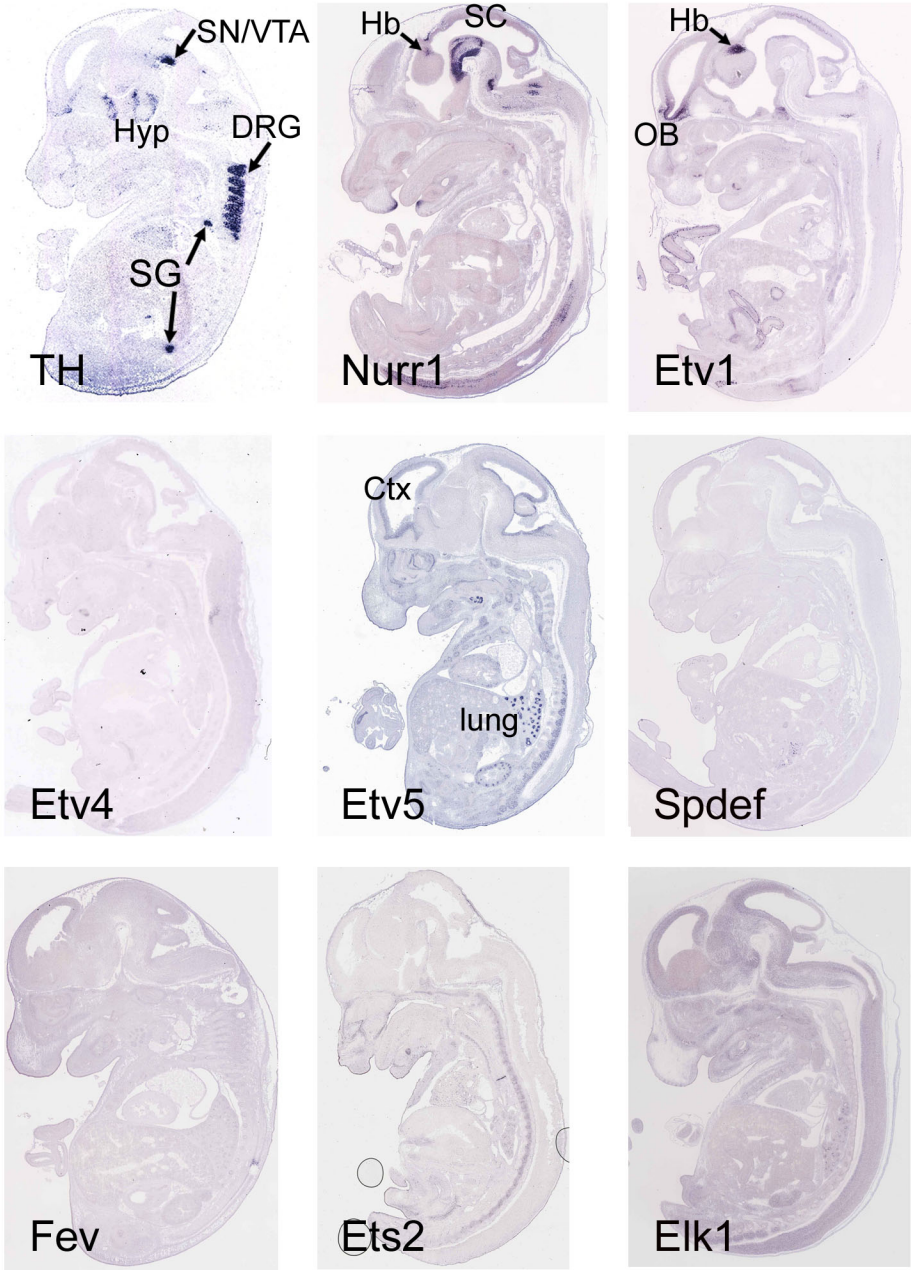



E11.5

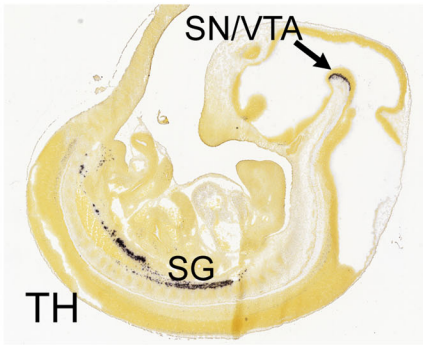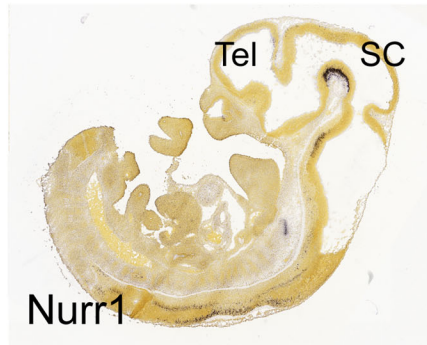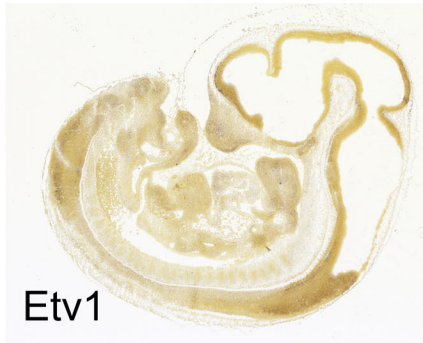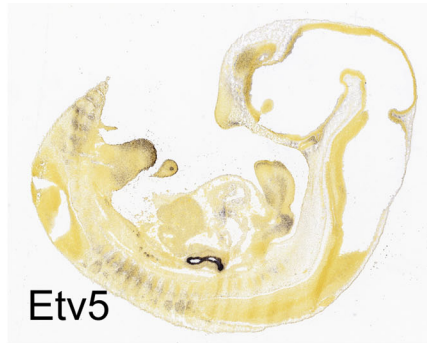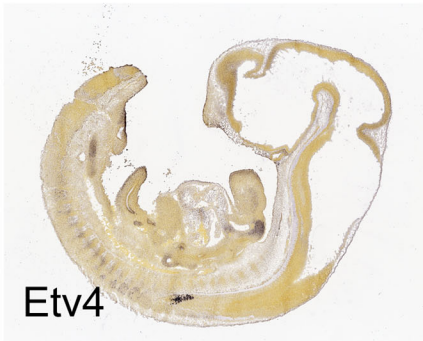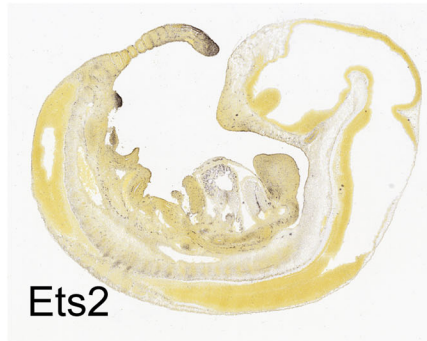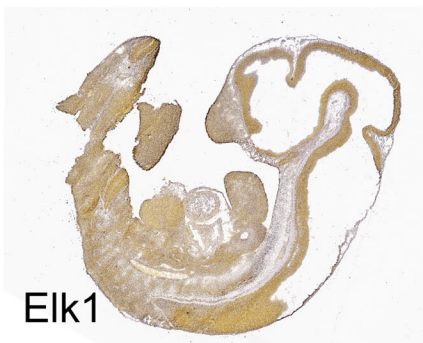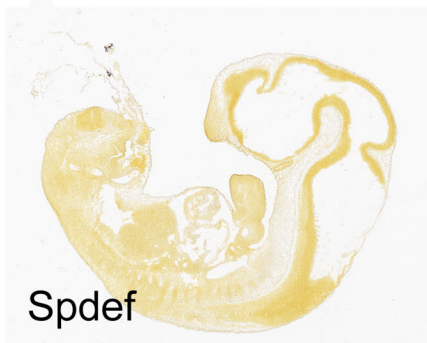

Wang and Turner Supplementary Figure 4

E13.5

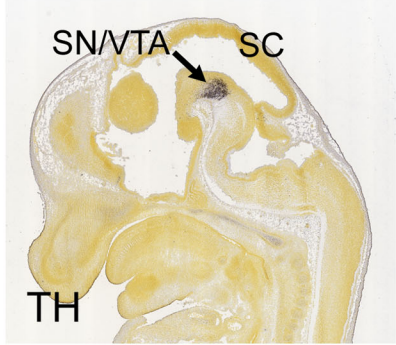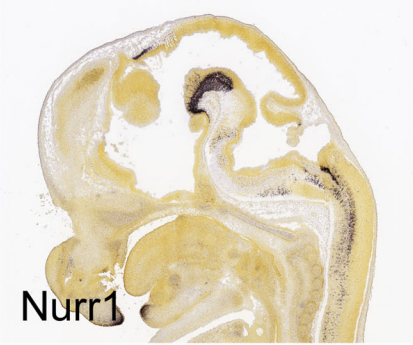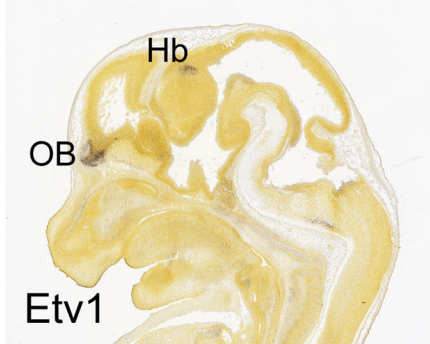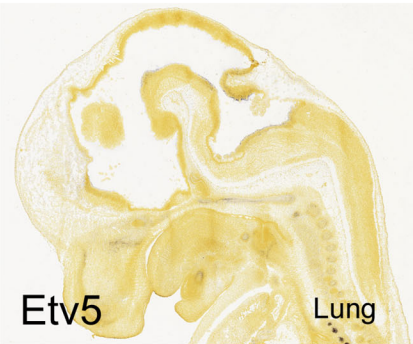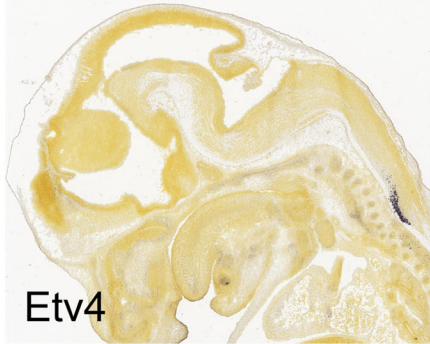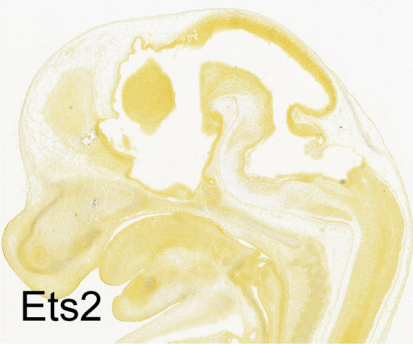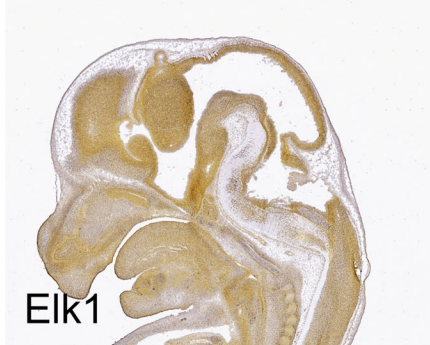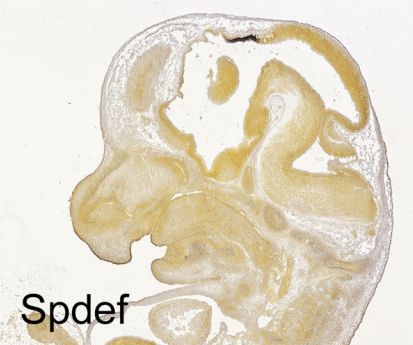

Wang and Turner Supplementary Figure 5



E15.5

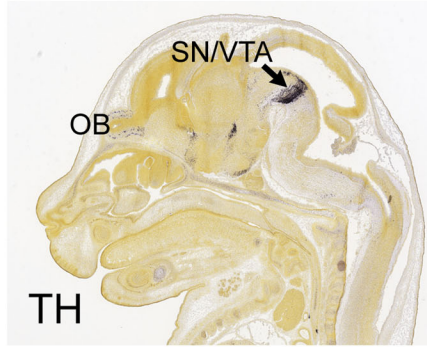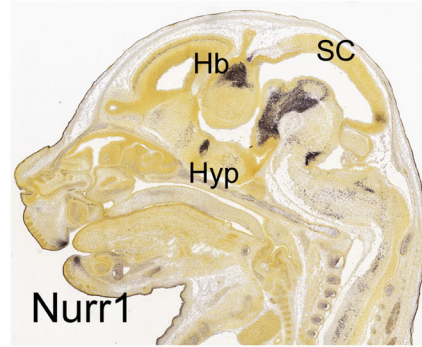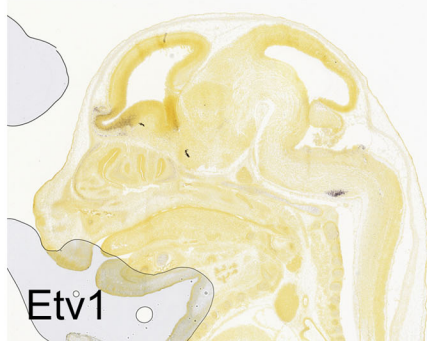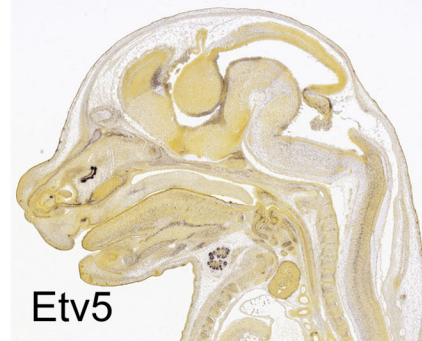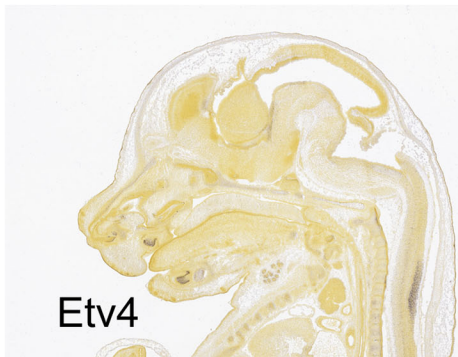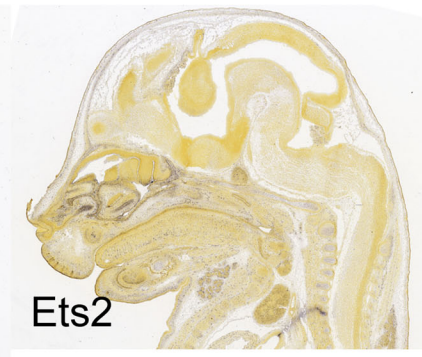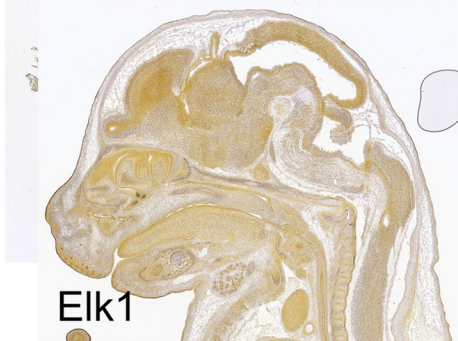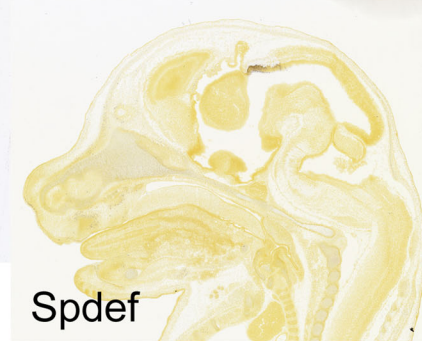

Wang and Turner Supplementary Figure 6
